# Supplementary material for: A thixotropic molecular hydrogel composite composed of polymer hydrogelator and self-doping polyaniline copolymer for electrochromic and glucose sensing applications
Source: Royal Society of Chemistry journal article supplement (doi:10.1039/d3nj03737a), 2023-01-01
Supplement: d3nj03737a1.pdf [file d3nj03737a1.pdf]

## Electronic Supplementary Information

### Thixotropic molecular hydrogel composite composed of polymer hydrogelator and self-doping polyaniline copolymer for electrochromic and glucose sensing applications

Yutaka Ohseido\*<sup>a</sup> and Mayumi Sasaki<sup>b</sup>

<sup>a</sup> Division of Engineering, Faculty of Engineering, Nara Women's University, Kita-uoyahigashi-machi, Nara 630-8506 (Japan).

E-mail: [ohseido@cc.nara-wu.ac.jp](mailto:ohseido@cc.nara-wu.ac.jp)

<sup>b</sup> Graduate school of Human Centered Engineering, Nara Women's University.

Fig. S1

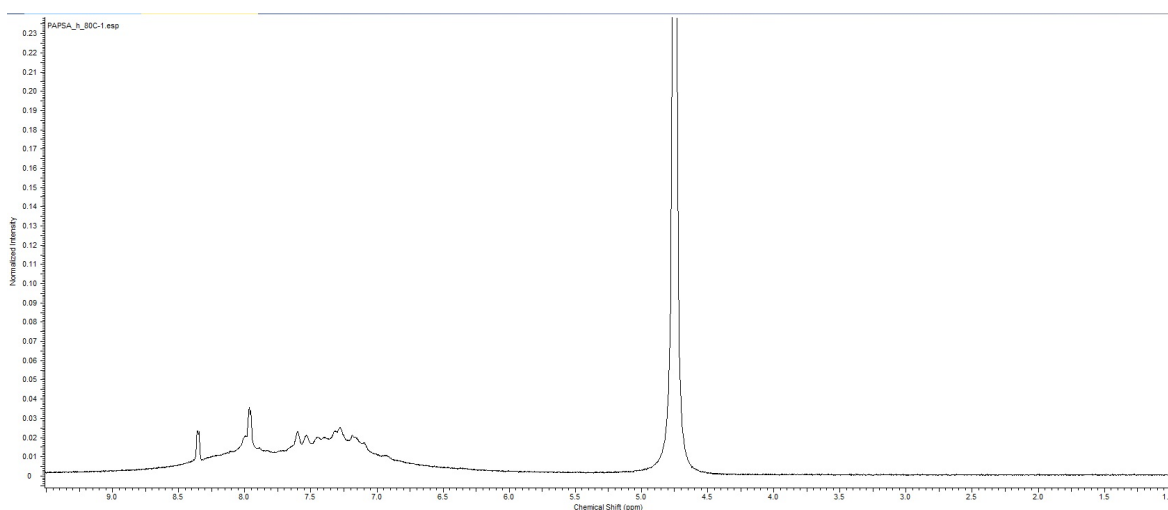

Fig. S1. <sup>1</sup>H-NMR (500 MHz) spectrum of PASPA in D<sub>2</sub>O at 80°C.
